# Supplementary material for: Effect of Anterioposterior Weight-Shift Training with Visual Biofeedback in Patients with Step Length Asymmetry after Subacute Stroke
Source: MDPI journal article supplement (doi:10.3390/jpm13121726), 2023-12-18
Supplement: s1 [file s1]

**Supplementary Table S1.** Comparison of Temporospatial Walking Parameters

|                         | AP training group |                | Control group   |                | P value |
|-------------------------|-------------------|----------------|-----------------|----------------|---------|
|                         | Before training   | After training | Before training | After training |         |
| Cadence (step/min)      | 57.4±14.1         | 62.6±20.3      | 53.2±15.6       | 58.8±19.1      | 0.809   |
| Walking speed (m/s)     | 0.2±0.1           | 0.3±0.2        | 0.2±0.1         | 0.3±0.1        | 0.742   |
| Stride time(s)          | 2.3±0.8           | 2.2±0.9        | 2.5±0.8         | 2.3±0.7        | 0.214   |
| Step time (s)           | 1.2±0.3           | 1.2±0.5        | 1.3±0.4         | 1.2±0.5        | 0.271   |
| Single support time (s) | 0.3±0.1           | 0.3±0.1        | 0.3±0.1         | 0.3±0.1        | 0.876   |
| Double support time (s) | 1.5±0.8           | 1.3±0.9        | 1.6±0.8         | 1.3±0.7        | 0.574   |
| Stance time (s)         | 1.7±0.8           | 1.6±0.9        | 1.8±0.9         | 1.5±0.7        | 0.370   |
| Swing time (s)          | 0.6±0.3           | 0.6±0.2        | 0.7±0.4         | 0.7±0.5        | 0.316   |
| Stride length (m)       | 0.4±0.1           | 0.5±0.2        | 0.4±0.1         | 0.5±0.2        | 0.298   |
| Step length (m)         | 0.3±0.1           | 0.3±0.1        | 0.3±0.1         | 0.3±0.1        | 0.376   |

Data presented as mean ± standard deviation; \*  $P < 0.05$  was statistically significant for time × intervention interaction.

**Supplementary Table S2.** Comparison of Kinematic Parameters

|                                      | AP training group |                | Control group   |                | P value |
|--------------------------------------|-------------------|----------------|-----------------|----------------|---------|
|                                      | Before training   | After training | Before training | After training |         |
| Affected side                        |                   |                |                 |                |         |
| Pelvic max anterior tilt angle at ST | 18.4±5.3          | 18.1±4.3       | 20.7±4.9        | 19.1±3.5       | 0.439   |
| Hip max flexion angle at IC          | 27.6±11.7         | 28.7±9.0       | 28.8±8.7        | 27.9±5.7       | 0.400   |
| Hip max flexion angle at SW          | 33.2±11.3         | 34.1±8.5       | 36.8±8.0        | 35.5±7.0       | 0.373   |
| Hip min flexion angle at ST          | 13.1±10.6         | 10.1±10        | 13.1±8.6        | 10.4±7.9       | 0.925   |
| Hip max abduction angle              | 3.1±5.6           | 3.6±4.6        | 5.3±4.2         | 5.3±3.4        | 0.778   |
| Hip max adduction angle              | -6.4±6.4          | -6.6±3.8       | -4.9±2.7        | -4.7±3.0       | 0.750   |
| Knee flexion angle at IC             | 15.6±8.1          | 13.8±7.3       | 14.1±7.7        | 12.3±6.3       | 0.997   |
| Knee min flexion angle at ST         | 8.8±10.2          | 7.2±10.2       | 5.9±9.0         | 5.6±8.0        | 0.658   |
| Knee max flexion angle at SW         | 34.2±13.2         | 38.6±13.5      | 33.6±11.2       | 33.0±10.0      | 0.142   |
| Ankle DF angle at IC                 | -13.9±5.8         | -13.8±6.1      | -14.8±9.1       | -13.2±8        | 0.362   |
| Ankle max DF angle at ST             | 2.7±8.6           | 3.6±6.9        | 2.5±7.4         | 4.2±6.2        | 0.678   |
| Ankle max PF at SW                   | -17.2±8.2         | -16.8±7.3      | -18.0±10.1      | -14.4±8.4      | 0.095   |
| Unaffected side                      |                   |                |                 |                |         |
| Pelvic max anterior tilt angle at ST | 18.8±5.4          | 18.2±4.2       | 21.2±5.4        | 19.3±3.8       | 0.442   |
| Hip max flexion angle at IC          | 38.5±8.7          | 40.2±6.4       | 40.9±8.3        | 39.2±7.4       | 0.183   |
| Hip max flexion angle at SW          | 39.8±9.4          | 42.6±6.3       | 43.0±9.3        | 42.8±6.5       | 0.185   |
| Hip min flexion angle at ST          | 9.7±9.2           | 7.0±7.2        | 8.3±8.6         | 5.8±7.5        | 0.970   |
| Hip max abduction angle              | 3.8±4.6           | 4.1±4.6        | 4.5±3.9         | 3.7±4.9        | 0.441   |
| Hip max adduction angle              | -8.2±5.1          | -8.9±5.1       | -7.7±6.3        | -8.9±6.8       | 0.754   |
| Knee flexion angle at IC             | 27.1±7.6          | 26.3±7.1       | 26.7±5.6        | 24.8±8.7       | 0.651   |
| Knee min flexion angle at ST         | 16.0±7            | 13.6±8.0       | 11.0±6.9        | 11.8±5.9       | 0.090   |

|                              |          |          |           |           |       |
|------------------------------|----------|----------|-----------|-----------|-------|
| Knee max flexion angle at SW | 55.4±7.8 | 59.4±8.5 | 55.4±10.4 | 60.3±9.0  | 0.720 |
| Ankle DF angle at IC         | 0.7±4.6  | -1.5±6.2 | 1.1±4.3   | -2.8±6.6  | 0.432 |
| Ankle max DF angle at ST     | 15.6±4.0 | 14.2±3.7 | 15.4±5.4  | 14.5±4.2  | 0.693 |
| Ankle max PF at SW           | -4.9±5.6 | -9.4±7.1 | -6.8±6.5  | -11.6±6.6 | 0.873 |

Data presented as mean ± standard deviation; \*  $P < 0.05$  was statistically significant for time × intervention interaction.; ST, stance phase; IC, initial contact; SW, swing phase; DF, dorsiflexion; PF, plantarflexion;

**Supplementary Table S3.** Comparison of Kinetic Parameters

|                |                            | AP training group |                | Control group   |                | P value |
|----------------|----------------------------|-------------------|----------------|-----------------|----------------|---------|
|                |                            | Before training   | After training | Before training | After training |         |
| Affected side  |                            |                   |                |                 |                |         |
|                | Hip max flexion moment     | 0.4±0.2           | 0.3±0.1        | 0.3±0.2         | 0.3±0.1        | 0.512   |
|                | Hip max extension moment   | -0.3±0.1          | -0.3±0.        | -0.3±0.1        | -0.4±0.2       | 0.260   |
|                | Hip max power generation   | 0.8±0.3           | 0.8±0.4        | 0.7±0.2         | 0.8±0.3        | 0.794   |
|                | Hip max power absolution   | -0.9±0.8          | -0.8±0.6       | -0.7±0.7        | -0.6±0.7       | 0.945   |
|                | Knee max flexion moment    | 0.3±0.2           | 0.3±0.2        | 0.2±0.2         | 0.2±0.3        | 0.975   |
|                | Knee max extension moment  | -0.2±0.1          | -0.2±0.1       | -0.2±0.1        | -0.1±0.1       | 0.991   |
|                | Knee max power generation  | 1.8±1.2           | 1.8±0.9        | 1.6±1.0         | 1.7±1.0        | 0.736   |
|                | Knee max power absolution  | -0.3±0.1          | -0.3±0.1       | -0.3±0.1        | -0.2±0.1       | 0.612   |
|                | Ankle max PF moment        | 0.6±0.3           | 0.6±0.2        | 0.6±0.2         | 0.6±0.3        | 0.907   |
|                | Ankle max DF moment        | -0.0±0.0          | -0.0±0.0       | -0.0±0.1        | -0.0±0.1       | 0.980   |
|                | Ankle max power generation | 9.2±0.7           | 9.1±1.3        | 9.2±0.8         | 9.3±0.8        | 0.554   |
|                | Ankle max power absolution | -0.1±0.0          | -0.1±0.0       | -0.1±0.0        | -0.1±0.0       | 0.816   |
| Unffected side |                            |                   |                |                 |                |         |
|                | Hip max flexion moment     | 0.5±0.2           | 0.5±0.2        | 0.5±0.2         | 0.4±0.1        | 0.560   |
|                | Hip max extension moment   | -0.5±0.2          | -0.5±0.2       | -0.4±0.2        | -0.5±0.3       | 0.840   |
|                | Hip max power generation   | 0.6±0.2           | 0.8±0.2        | 0.7±0.3         | 0.7±0.3        | 0.256   |
|                | Hip max power absolution   | -1.6±0.6          | -1.7±0.4       | -1.4±0.5        | -1.5±0.5       | 0.766   |
|                | Knee max flexion moment    | 0.7±0.2           | 0.7±0.2        | 0.6±0.2         | 0.6±0.3        | 0.948   |
|                | Knee max extension moment  | -0.2±0.0          | -0.2±0.1       | -0.2±0.1        | -0.2±0.0       | 0.407   |
|                | Knee max power generation  | 3.1±0.7           | 3.1±0.5        | 2.7±0.8         | 2.9±0.8        | 0.366   |
|                | Knee max power absolution  | -0.7±0.2          | -0.7±0.2       | -0.6±0.2        | -0.6±0.2       | 0.895   |
|                | Ankle max PF moment        | 0.8±0.2           | 0.8±0.2        | 0.7±0.2         | 0.8±0.2        | 0.246   |
|                | Ankle max DF moment        | -0.0±0.0          | -0.0±0.0       | -0.0±0.0        | -0.0±0.1       | 0.511   |
|                | Ankle max power generation | 9.6±0.8           | 9.7±0.7        | 9.4±0.5         | 9.3±0.7        | 0.612   |
|                | Ankle max power absolution | -0.1±0.1          | -0.2±0.1       | -0.2±0.1        | -0.1±0.2       | 0.082   |

Data presented as mean ± standard deviation; \*  $P < 0.05$  was statistically significant for time × intervention interaction.; PF, plantarflexion; DF, dorsiflexion;
